# Supplementary material for: Towards a holistic approach to metrics for the 21st century pharmaceutical industry
Source: Royal Society of Chemistry journal article supplement (doi:10.1039/c5gc00340g), 2015-01-01
Supplement: c5gc00340g2.pdf [file c5gc00340g2.pdf]

## Supplementary information

### Appendix 1: Survey of available Green Chemistry metrics

|                                                        |                                                                                                                                                                                                 |
|--------------------------------------------------------|-------------------------------------------------------------------------------------------------------------------------------------------------------------------------------------------------|
| Abiotic Depletion Potential <sup>1</sup>               | $Index_{ADP} = ADP \cdot \text{mass of product}$<br>ADP values from reference tables                                                                                                            |
| Acidification Potential <sup>1,2</sup>                 | $AP =$<br>where a: number of dissociable H <sup>+</sup> in the formed acid<br>$Index_{AP} = AP \cdot \text{mass of product}$                                                                    |
| Atmospheric Acidification Potential <sup>3</sup>       | $AP = \frac{\text{Total mass of SO}_2 \text{ equivalents}}{\text{Mass of Product}}$                                                                                                             |
| Atom Economy <sup>4,5,6</sup>                          | $\frac{MW \text{ of product(s)}}{MW \text{ of all reagents}} \cdot 100\%$                                                                                                                       |
| Actual Atom Economy <sup>3</sup>                       | $AAE = AE \times \varepsilon$                                                                                                                                                                   |
| Atom Utilisation <sup>7</sup>                          | $\frac{\text{mass of product}}{\text{total mass of all substances produced}}$                                                                                                                   |
| Bioaccumulation <sup>1</sup>                           | logP or logK <sub>ow</sub>                                                                                                                                                                      |
| Octanol-water partition Coefficient (K <sub>ow</sub> ) | $K_{ow} = \frac{\text{concentration in octanol phase}}{\text{concentration in water}}$                                                                                                          |
| Bioconcentration factor                                | $BCF = \frac{\text{concentration in tissue of aquatic org.}}{\text{concentration in water}}$                                                                                                    |
| Carbon Efficiency <sup>3,4</sup>                       | $\frac{\text{mass of carbon in product}}{\text{total mass of carbon in key reagents}}$                                                                                                          |
| E-factor <sup>5,8,9,10</sup>                           | $\frac{m_A}{m_p} + \frac{m_B}{m_p} + \frac{m_{aux}}{m_p} + \frac{m_s}{m_p} - 1$<br>where A,B: reactants, p: product, aux: auxiliaries, s: solvents                                              |
| E-factor based on mass                                 | $E_m = \frac{1}{RME} - 1$                                                                                                                                                                       |
| E-factor based on Molecular Weight                     | $E_{MW} = \frac{[(MW) \times (\text{Stoichiometric coefficient})]_{waste}}{[(MW) \times (\text{Stoichiometric coefficient})]_{product}}$                                                        |
| Effective Mass Yield <sup>7,11</sup>                   | $\frac{\text{mass of product}}{\text{mass of non - benign reagent}}$                                                                                                                            |
| Elemental Efficiency <sup>7</sup>                      | $\frac{\text{mass of element in product}}{\text{total mass of element in stoichiometric reagents}}$                                                                                             |
| Emissions of specific compound released <sup>12</sup>  | $E_i = \frac{\text{mass of compound } i \text{ released as CO}_2}{\text{basis of mass balance calculations}} \text{ [g CO}_2 \text{ / kg of intermediate crystallised]}$                        |
| Energy Efficiency <sup>6</sup>                         | $\frac{\text{From a complete life cycle theoretical energy demand}}{\text{actual energy spent}}$<br>For individual process<br>$\frac{\text{energy spent on step}}{\text{overall energy spent}}$ |
| Energy Intensity <sup>4</sup>                          | $EI = \frac{\text{total process energy}}{\text{mass product}}$                                                                                                                                  |

|                                                        |                                                                                                                                                                                                                                          |
|--------------------------------------------------------|------------------------------------------------------------------------------------------------------------------------------------------------------------------------------------------------------------------------------------------|
| Environmental Quotient <sup>3</sup>                    | $EQ = E \cdot Q$ <p>Where E: E-factor, Q: Environmentally hazardous quotient</p>                                                                                                                                                         |
| Eutrophication Potential <sup>2</sup>                  | $EP = \frac{\text{Total Mass of phosphate equivalents}}{\text{Mass of Product}}$ $\text{Index}_{EP} = EP \cdot m_{\text{mass of product}}$                                                                                               |
| Global Warming <sup>1</sup>                            | $\frac{\text{kg CO}_2 \text{ eq}}{\text{kg of product}}$                                                                                                                                                                                 |
| Global Warming Potential <sup>1,3,13</sup>             | $GWP = \frac{\text{Total mass of CO}_2 \text{ equivalents}}{\text{Mass of Product}}$ $GWP = \frac{\left[ \frac{NC}{MW} \right] \text{ of a compound}}{\left[ \frac{NC_{CO_2}}{MW_{CO_2}} \right]}$ <p>where NC: number of carbon</p>     |
| Green House Gases emissions <sup>6</sup>               | $\sum (GHG_i \cdot P_i)$ <p>Where P<sub>i</sub>: Global warming potential factor</p>                                                                                                                                                     |
| Human Toxicity by Ingestion Potential <sup>1</sup>     | $INGTP = \frac{\left[ \frac{C_w}{LD_{50}} \right]}{\left[ \frac{C_{w,tot}}{LD_{50,tot}} \right]}$ <p>where C<sub>w</sub>: concentration in water<br/> <math display="block">I_{INGTP} = INGTP \cdot m</math></p>                         |
| Human Toxicity by Inhalation Potential <sup>4</sup>    | $INHTP = \frac{\left[ \frac{C_a}{LD_{50}} \right]}{\left[ \frac{C_{a,tot}}{LD_{50,tot}} \right]}$ <p>where C<sub>a</sub>: airborne concentration of the emitted chemical<br/> <math display="block">I_{INHTP} = INHTP \cdot m</math></p> |
| Mass Intensity <sup>4,8,12,13</sup>                    | $\frac{\text{total mass input excluding water}}{\text{mass of product}}$                                                                                                                                                                 |
| Material Inputs Per Unit Service (MIPS) <sup>6</sup>   | $\frac{\text{weighted material input over life cycle}}{\text{units of service obtainable}}$                                                                                                                                              |
| Material Recovery Parameter <sup>3</sup>               | $MRP = \frac{\text{Total mass of reaction and postreaction solvents} + \text{mass of product}}{\text{Total mass of reaction and postreaction solvents} + \text{mass of product}}$                                                        |
| Ozone depleting gas emissions <sup>1,6</sup>           | $\sum (ODG_i \cdot P_i)$ <p>Where P<sub>i</sub>: Potency factor</p>                                                                                                                                                                      |
| Persistence – Aerobic Biodegradation Rate <sup>1</sup> | $I = 3.199 + a_1 f_1 + a_2 f_2 + \dots + a_m MW$                                                                                                                                                                                         |
| Persistence and Bioaccumulative <sup>4</sup>           | $\frac{\text{total[mass persistent + bioaccumulative]}}{\text{mass of product}} \cdot \frac{\text{total[mass persistent + bioaccumulative]}}{\frac{EC_{50a \text{ material}}}{EC_{50 \text{ DDT control}}}}$                             |
| Photochemical oxidation (smog) potential <sup>3</sup>  | $PCOP = \frac{\text{Total mass of ethylene eq.}}{\text{Mass of product}}$                                                                                                                                                                |

|                                                                                                                          |                                                                                                                                                                                                                                                                                                                                 |
|--------------------------------------------------------------------------------------------------------------------------|---------------------------------------------------------------------------------------------------------------------------------------------------------------------------------------------------------------------------------------------------------------------------------------------------------------------------------|
| PMI Complexity Model <sup>14</sup>                                                                                       | $PMI = 131 + 26C + 40H - 515A + 57(C - 1.5)(H - 8)$ <p>Where C: total number of chiral centres, H: total number of heteroatoms,<br/>A: fraction aromatic<br/> <math display="block">A = \frac{\text{aromatic heavy atoms} + \text{heteroaromatic heavy atoms}}{\text{heavy atoms}}</math></p>                                   |
| Primary Energy Usage                                                                                                     | $\frac{\text{kg fuel}}{\text{kg product}}$                                                                                                                                                                                                                                                                                      |
| Process Mass Intensity (Overall) <sup>15</sup><br>16                                                                     | $\frac{\text{total mass in a process or process step}}{\text{mass of product}}$                                                                                                                                                                                                                                                 |
| Process Solvent Mass Intensity <sup>4</sup>                                                                              | $\frac{\text{total solvent input excluding water}}{\text{mass of product}}$                                                                                                                                                                                                                                                     |
| Process Water Mass Intensity                                                                                             | $\frac{\text{fresh water} - \text{recycled water}}{\text{mass of product}}$                                                                                                                                                                                                                                                     |
| Process Water Use                                                                                                        | $\frac{\text{amount of water used}}{\text{unit of product}}$                                                                                                                                                                                                                                                                    |
| Raw Material Use                                                                                                         | $\frac{\text{mass raw material}}{\text{mass product}}$                                                                                                                                                                                                                                                                          |
| Reaction Mass Efficiency (RME) (Tot.) <sup>4,8,6,11,9</sup>                                                              | $\frac{\text{mass of products}}{\text{mass of all reactants}}$                                                                                                                                                                                                                                                                  |
| RME: Excess reagent used, reaction catalyst and solvent disposed, workup and purification materials disposed             | $(\varepsilon)(AE) \left( \frac{1}{SF} \right) \left( \frac{1}{1 + \left( \frac{\varepsilon(AE)[c + s + \omega]}{(SF)(m_p)} \right)} \right)$ <p>Where <math>\varepsilon</math>: yield, AE: atom economy, SF: stoichiometric factor, c: catalyst, s: solvent, <math>\omega</math>: waste, <math>m_p</math>: mass of product</p> |
| RME: No excess reagent used, reaction catalyst and solvent disposed, workup and purification materials disposed          | $(\varepsilon)(AE) \left( \frac{1}{1 + \left( \frac{\varepsilon(AE)[c + s + \omega]}{(m_p)} \right)} \right)$                                                                                                                                                                                                                   |
| RME: No excess reagent used, reaction catalyst disposed, solvent recovered, workup and purification materials disposed   | $(\varepsilon)(AE) \left( \frac{1}{1 + \left( \frac{\varepsilon(AE)[c + \omega]}{(m_p)} \right)} \right)$                                                                                                                                                                                                                       |
| RME: No excess reagent used, reaction catalyst disposed, solvent recovered, workup and purification materials recovered  | $(\varepsilon)(AE) \left( \frac{1}{1 + \left( \frac{\varepsilon(AE)[c]}{(m_p)} \right)} \right)$                                                                                                                                                                                                                                |
| RME: Excess reagent used, reaction catalyst recovered, solvent recovered, workup and purification materials recovered    | $(\varepsilon)(AE) \left( \frac{1}{SF} \right)$                                                                                                                                                                                                                                                                                 |
| RME: No excess reagent used, reaction catalyst recovered, solvent recovered, workup and purification materials recovered | $(\varepsilon)(AE)$                                                                                                                                                                                                                                                                                                             |
| Reaction Yield <sup>3</sup>                                                                                              | $\varepsilon = \frac{\text{Mass of product}}{\text{Theoretical mass of product}}$                                                                                                                                                                                                                                               |
| Recyclability                                                                                                            | $\frac{\text{number of different materials}}{\text{unit of product}}$                                                                                                                                                                                                                                                           |
| Renewability <sup>6</sup>                                                                                                | $\frac{\text{rate of consumption of renewable energy}}{\text{overall rate of energy consumption}}$                                                                                                                                                                                                                              |

|                                         |                                                                                                                                                                                                                     |
|-----------------------------------------|---------------------------------------------------------------------------------------------------------------------------------------------------------------------------------------------------------------------|
| Renewability Index <sup>3</sup>         | $RI = \frac{\text{Total energy supplied from renewable resources}}{\text{Total energy supplied to the process}}$                                                                                                    |
| Renewable Intensity <sup>13</sup>       | $\frac{\text{mass of all renewably derived materials used}}{\text{mass of product}}$                                                                                                                                |
| Risk Index                              | $I = P \cdot m$<br>where P: risk potential, m: mass of chemical risk                                                                                                                                                |
| Smog Formation <sup>1</sup>             | $SFP = \frac{MIR}{MIR_{ROG}}$<br>where MIR: maximum Incremental Reactivity<br>ROG: Reactive organic gases<br>$I_{SFP} = SFP \cdot m$                                                                                |
| Solvent recovery Energy <sup>3</sup>    | $\frac{\text{total solvent recover energy requirements}}{\text{mass of final product}}$                                                                                                                             |
| Solvent Intensity <sup>12,13</sup>      | $\frac{\text{mass of solvent}}{\text{mass of product}}$                                                                                                                                                             |
| Stoichiometric Factor <sup>3,9,11</sup> | $SF = 1 + \frac{\sum \text{mass}_{\text{excess reagent}}}{\sum \text{mass}_{\text{stoichiometric reagent}}}$<br>$SF = 1 + \frac{(AE) \sum \text{mass}_{\text{excess reagent}}}{\text{theoretical mass of product}}$ |
| VOCs emissions                          | $\frac{\text{solvent recycled}}{\text{total solvent use}}$                                                                                                                                                          |
| Waste Intensity <sup>12,13</sup>        | $\frac{\text{total waste produced}}{\text{total mass input}}$                                                                                                                                                       |
| Waste treatment energy <sup>3</sup>     | $\frac{\text{waste treatment energy requirements}}{\text{kg of final product}}$                                                                                                                                     |
| Water Consumption                       | Volume of water consumed in the process ore process unit                                                                                                                                                            |

<sup>1</sup> S.M. Mercer, J. Andraos, P.G. Jessop, **2012**. J. Chem. Educ., 89, 215-220

<sup>2</sup> A.D. Curzons, C. Jimenez-Gonzalez, A.L. Duncan, J.C. Constable, V.L. Cunningham, **2007**. Int. J. LCA, 12, 4, 272-280

<sup>3</sup> G.J. Ruiz-Mercado, R.L. Smith, M.A. Gonzalez, **2012**. Ind. Eng. Chem. Res., 51, 2309-2328

<sup>4</sup> A.D. Curzons, D.J.C. Constable, D.N. Mortimer, V.L. Cunningham, **2001**. Green Chemistry, 3, 1-6

<sup>5</sup> R.A. Sheldon, **2007**. Green Chem., 9, 1273-1283

<sup>6</sup> A. Lapkin, L. Joyce, B. Crittenden, **2004**. Environ. Sci. Technol., 38, 5815-5823

<sup>7</sup> M.G.T.C. Ribeiro, A.A.S.C. Machado, **2012**. Green Chemistry Letters and Reviews, 1-18

<sup>8</sup> J. Aue, **2008**. Green Chemistry, 10, 225-231

<sup>9</sup> J. Andraos, **2005**. Org. Proc. Res. & Dev., 9, 149-163, J. Andraos, **2005**. Org. Proc. Res. & Dev., 9, 404-431

<sup>10</sup> M.G.T.C. Ribeiro, A.A.S.C. Machado, **2012**. Green Chemistry Letters and Reviews, 1-18

<sup>11</sup> D.J.C. Constable, A.D. Curzons, V.L. Cunningham, **2004**. Green Chemistry, 4, 521-527

<sup>12</sup> C. Jimenez-Gonzalez, D.J.C. Constable, A.D. Curzons, V.L. Cunningham, **2002**. Clean Techn. Environ. Policy, 4, 44-53

<sup>13</sup> C. Jimenez-Gonzalez, D.J.C. Constable, C. S. Ponder, 2012. Chem. Soc. Rev., 41, 1485-1498

<sup>14</sup> D.P. Kjell, I.A. Watson, C.N. Wolfe, J.T. Spitler, 2013. Org. Process Res. Dev., 17, 2, 169-174

<sup>15</sup> C. Jimenez-Gonzalez, C.S. Ponder, Q.B. Broxterman, J.B. Manley, 2011. Org. Proc. Res. Dev., 15, 912-917

<sup>16</sup> C. Jimenez-Gonzalez, C. Ollech, W. Pyrz, D. Hughes, Q.B. Broxterman, N. Bathela, 2013. Org.
